# Supplementary material for: LncRNA AY promotes hepatocellular carcinoma metastasis by stimulating ITGAV transcription
Source: PubMed Central journal article supplement — Theranostics. 2019 Jun 9;9(15):4421–36. doi: 10.7150/thno.32854 (PMC6599657; doi:10.7150/thno.32854), 2019-06-09
Supplement: thnov09p4421s1.pdf [file thnov09p4421s1.pdf]

Supplemental Table 1. Summary of primers used in the study

| Primers for plasmid construction (5'-3') |                                                                        |
|------------------------------------------|------------------------------------------------------------------------|
| AY-F1                                    | TGAAACGCTGCCATCAACA                                                    |
| AY-R906                                  | TCAGGGAGGCATAAAAGAAC                                                   |
| AY-F1-kpnI                               | AAAAGGTACCTGAAACGCTGCCATCAACA                                          |
| AY-R298-kpnI                             | CCCCGGTACCGGAGGCCGAGTAGAACTGAA                                         |
| AY-R371-kpnI                             | AAAAGGTACCAATGCAACACCGATACCAAA                                         |
| AY-R401-kpnI                             | AAAAGGTACCGGCTTATGAGGGTAAGGAGGAT                                       |
| AY-R522-kpnI                             | AAAAGGTACCTAAGTGGCAGAGCTGGGAGAT                                        |
| AY-R671-kpnI                             | CCCCGGTACCTCCTGCTTCACTGTGGTTCTT                                        |
| AY-F371-KpnI                             | AAAAGGTACCTTCCAGGCCATCCTCCTTA                                          |
| AY-R370                                  | CATGGGTTCTCTGGGGCATGCAACACCGATACCAAAAC                                 |
| AY-F523                                  | GTTTTGGTATCGGTGTTGCATGCCCCAGAGGAACCCATG                                |
| AYgRNA-53-F                              | ACACCGCTCCCCAGGACTGTCATAACGTTTTAGAGCTAGAAATAGCAAGTTAAAATAAGGCTAGTCCGTT |
| AYgRNA-53-R                              | AACGGACTAGCCTTATTTTAACTTGCTATTTCTAGCTCTAAAACGTTATGACAGTCCTGGGGAGCGGTGT |
| AYgRNA-1135-F                            | ACACCGATGGTACTGGGTTTTAGCGGTTTTAGAGCTAGAAATAGCAAGTTAAAATAAGGCTAGTCCGTT  |
| AYgRNA-1135-R                            | AACGGACTAGCCTTATTTTAACTTGCTATTTCTAGCTCTAAAACCGCTAAAACCCAGTACCATCGGTGT  |
| shAY t292                                | GATCC GGCCTCCCATCAAAGGTTTTTCAAGAGAAAACCTTTGATGGGAGGCC AGA              |
| shAY b292                                | AGCTTCT GGCCTCCCATCAAAGGTTTTCTCTTGAAAAACCTTTGATGGGAGGCC G              |
| siAY t378                                | GATCC CCATCCTCCTTACCCTCATTTCATGAGAATGAGGGTAAGGAGGATGG AGA              |
| siAY b378                                | AGCTTCT CCATCCTCCTTACCCTCATTCTCTTGAAATGAGGGTAAGGAGGATGG G              |
| ITGAV t2179                              | GATCCGCTGAGCTCATCGTTTTCCATTCAAGAGATGGAACCGATGAGCTCAGCAGA               |
| ITGAV b2179                              | AGCTTCTGCTGAGCTCATCGTTTTCCATCTCTTGAATGGAACCGATGAGCTCAGCG               |
| Primers for PCR (5'-3')                  |                                                                        |
| AY-qPCR-F9                               | TGCCATCAACAGAACATCAC                                                   |
| AY-qPCR-R199                             | GAGGAGCAGCCATACCC                                                      |
| GAPDH-qPCR-F                             | CGGATTTGGTCGTATTGGG                                                    |
| GAPDH-qPCR-R                             | CGCTCCTGGAAGATGGTGAT                                                   |
| ITGAV-qPCR-F                             | GACAGTCCTGCCGAGTA                                                      |
| ITGAV-qPCR-R                             | CTGGGTGGTGTGTTGCT                                                      |
| β-actinF                                 | GAGCTACGAGCTGCCTGACG                                                   |
| β-actinR                                 | CCTAGAAGCATTGCGGTGG                                                    |
| ITGB1F                                   | TGGGAACTTGGTGCC                                                        |
| ITGB1R                                   | CTCCTTGTAACAGGCTG                                                      |
| ITGB3F                                   | TCATCACCATCCACGACC                                                     |
| ITGB3R                                   | TCCACATACTGACATTCTCCC                                                  |
| ITGB5F                                   | GTCAGGAAGGGTTCGGAGT                                                    |
| ITGB5R                                   | AAGGCATAGCCATCACG                                                      |

|          |                       |
|----------|-----------------------|
| ITGB6F   | GCCATCTGTAACAACGG     |
| ITGB6R   | TTCTGGGCTGACAAGTAA    |
| ITGB8F   | GTGGTGCCCAATGACG      |
| ITGB8R   | GCTTCTGATAGGCTTCC     |
| ZNF282-F | CGCAACAGGAACTTCTGGGTC |
| ZNF282-R | GAGCATCTGGCTTGGGGACT  |

---

Primers for CHIP (5'-3')

---

|                    |                                                            |
|--------------------|------------------------------------------------------------|
| ITGAV-exon1-F1     | TTCGGCGATGGCTTTTC                                          |
| ITGAV-exon1-R1     | GGGCACGAAGAAATCCAC                                         |
| ITGAV-exon2-F1     | GGATGTTTCTTCTCGTGGA                                        |
| ITGAV-exon2-R1     | GCGGGTAGAAGACCAGTCA                                        |
| ITGAV-intron1-F1   | AAATCAACAAAGGCTGGTC                                        |
| ITGAV-intron1-R1   | AGACAGAGGCGGAAAGAG                                         |
| ITGAV-PMT-672F     | AGCTCCTGAGCCTGGGT                                          |
| ITGAV-PMT-492R     | CAACAGTCGCACGGAAGT                                         |
| ITGAV-PMT-894F     | TTCTTTGCCCTGCGAATC                                         |
| ITGAV-PMT-677R     | TCACGAACGAAACCCTGTT                                        |
| ITGAV-PMT-1241F    | GCTCATTTCTGTCTGCTATTCA                                     |
| ITGAV-PMT-1128R    | AGGACAGGAACCTTGACCTT                                       |
| AY probe436 (odd)  | AAATGCATCGAGCAGTGAGAGTCCATTTAGGAAGGGGCTTATGAGGGTAAG-Biotin |
| AY probe8 (even)   | TGATGTTCTGTTGATGGCAG-Biotin                                |
| AY probe873 (even) | AGAACAATGGAAGCCCCAC-Biotin                                 |
| LacZ probe         | TCACGACGTTGTAAAACGAC-Biotin                                |

---

Primers for siRNA (5'-3')

---

|         |                                                    |
|---------|----------------------------------------------------|
| siAY264 | CAGUCUUAGAUUUUGUUCAGUUU<br>ACUGAACAAAAUCUAAGACUGUU |
| siAY292 | GGCCUCCCAUCAAGGUUU<br>AAACCUUUGAUGGGAGGCC          |
| H1FX    | ACGUAGAUUUUGUACGGCUUU<br>AGCCGUACAAAAUCUACGUUU     |
| H1.2    | CGGCCACUGUAACCAAGAAUU<br>UUCUUGGUUACAGUGGCCGUU     |
| H1.3    | AAACACCUGUGAAGAAAAUU<br>UUUUUCUUCACAGGUGUUUUU      |
| H1.4    | UGUCCGAGCUCAUUACUAAUU<br>UUAGUAAUGAGCUCGGACAUU     |
| siITGAV | GGGAUUGACUUCUCAGCAU<br>AUGCUGAGAAGUCAAUCCC         |

---

Supplemental Table 2. Summary of antibodies used in the study

| Antibody name                    | Manufacturer             | Catalogue Number | Usage and Dilution                               |
|----------------------------------|--------------------------|------------------|--------------------------------------------------|
| ITAGV                            | Santa Cruz               | sc-10719         | Western blot (1:500);                            |
| E-cadherin                       | Santa Cruz               | sc-7870          | Immunohistochemistry (1:100)                     |
| N-Cadherin antibody [N2C1]       | Gene Tex                 | GTX112733        | Western blot (1:500)                             |
| Vimentin antibody                | Gene Tex                 | GTX112661        | Western blot (1:500)                             |
| ZEB1 antibody [N2C1]             | Gene Tex                 | GTX105278        | Western blot (1:500)                             |
| Twist1 antibody [10E4E6]         | Gene Tex                 | GTX60776         | Western blot (1:500)                             |
| beta-Catenin Antibody            | Proteintech              | 17565-1-AP       | Western blot (1:2000)                            |
| SOX2 Antibody                    | Proteintech              | 11064-1-AP       | Western blot (1:500)                             |
| OCT4 Antibody                    | Proteintech              | 11263-1-AP       | Western blot (1:500)                             |
| $\alpha$ V $\beta$ 3             | Millipore                | MAB1976          | Immunohistochemistry (1:100)                     |
| FITC-ITGAV                       | Biologend                | 327907           | Immunofluorescence (1:100); FACS (1:100)         |
| FITC- $\beta$ 3                  | Biologend                | 336403           | FACS (1:100)                                     |
| FITC- $\alpha$ V $\beta$ 3       | Biologend                | 304403           | FACS (1:100)                                     |
| Histone H1.0 Antibody            | Proteintech              | 17510-1-AP       | RNA-Pull down (1 $\mu$ g), Western blot (1:500)  |
| Histone H1.1 Antibody            | Proteintech              | 18201-1-AP       | RNA-Pull down (1 $\mu$ g), Western blot (1:500)  |
| Histone H1.2 Antibody            | Proteintech              | 19649-1-AP       | RNA-Pull down (1 $\mu$ g), Western blot (1:500)  |
| Histone H1.3 antibody            | Gene Tex                 | GTX104481        | RNA-Pull down (1 $\mu$ g), Western blot (1:500)  |
| Histone H1.4 Antibody            | Thermo Fisher Scientific | 702876           | RNA-Pull down (1 $\mu$ g), Western blot (1:500)  |
| Histone H1.5 Polyclonal Antibody | Thermo Fisher Scientific | PA5-19487        | RNA-Pull down (1 $\mu$ g), Western blot (1:500)  |
| Histone H1Fx antibody            | abcam                    | ab31972          | RNA-Pull down (1 $\mu$ g), Western blot (1:500)  |
| Histone H1 Antibody              | Proteintech              | 18201-1-AP       | RNA-Pull down (1 $\mu$ g), Western blot (1:500)  |
| HNRNPK Antibody                  | Proteintech              | 11426-1-AP       | RNA-Pull down (1 $\mu$ g), Western blot (1:1000) |
| NCL Antibody                     | Proteintech              | 10556-1-AP       | RNA-Pull down (1 $\mu$ g), Western blot (1:1000) |
| FUS/TLS Antibody                 | Proteintech              | 11570-1-AP       | RNA-Pull down (1 $\mu$ g), Western blot (1:1000) |
| U1 SnRNP70                       | Santa Cruz               | sc-390899        | RNA-Pull down (1 $\mu$ g), Western blot (1:1000) |
| GAPDH                            | Bioworld Technology Inc  | MB001            | Western blot (1:500)                             |
| HRP-IgG                          | Jackson ImmunoRes        | 111-035-003      | Western blot (1:10000)                           |
| CD31 polyclonal antibody         | Bioworld                 | BS90231          | Immunohistochemistry (1:100)                     |

## Supplement

AY927503 (AY) sequence was analyzed by CPAT (Coding Potential Assessment Tool) and CPC (coding potential calculator) web. As compared to positive control mRNA coding  $\beta$ -actin, AY transcript showed very low coding probability which was similar to non-coding RNA MALAT1 (Supplemental Figure 1A).

The expression of AY was then investigated in paired samples with HCC and adjacent nontumor tissues from 57 patients by in situ hybridization. Among them, there were 38 cases whose hybridization signals of AY were more extensive in HCC than those in their corresponding adjacent nontumor tissues and only 19 cases showed weaker AY signal in HCC than nontumor tissues (Supplemental Figure 1B).

We further observed that AY expression level was well correlated with *ITGAV* and AY significantly enhanced *ITGAV* transcription. However ectopic AY overexpression did not stimulate other subtypes of integrin except *ITGAV* as well as  $\beta$ 3 (Supplemental Figure 1C).

To further investigate the roles of AY in HCC, we overexpressed and knocked down AY based on 2 target sequences in HCC cells. As shown in Supplemental Figure 1D, the wound closure rate was significantly accelerated after AY overexpression, but this effect was almost abolished when *ITGAV* was silenced. Wound closure was however retarded after AY knockdown in SMMC-7721 cells, but reversed by *ITGAV* overexpression. The transmembrane migration ability of BEL-7404 cells overexpressing AY was significantly enhanced compared to that of mock cells, but knockdown of *ITGAV* completely ablated the stimulatory effect by AY (Supplemental

Figure 1E). Correspondingly, AY silence remarkably attenuated the migration ability of SMMC-7721 cells, but overexpressing ITGAV almost restored the cell migration rate to that of the scramble group (Figure 1E). The activities of lncRNA involved in gene transcriptional regulation is usually through affecting neighboring intrachromosomal genes in cis (1). In the present study, although the genomic loci of AY is located within ZNF282 gene on chromosome 7, overexpression of lncRNA AY did not affect the mRNA level of ZNF282 (Supplemental Figure 1F). Although statistical analysis of TCGA database indicated that there was positive correlation between AY and ZNF282 mRNAs (Pearson correlation coefficient  $r=0.54$ ,  $N=200$ , Supplemental Figure 1G), knockdown of AY did not affect the mRNA level of ZNF282 as well. ZNF282 did expressed higher level in HCC than in nontumor tissues ( $N=50$ ). But ZNF282 mRNA was poorly correlated with ITGAV mRNA (Pearson correlation coefficient  $r=-0.13$ ,  $N=371$ ). This implied that AY regulation of ITGAV transcription was independent of ZNF282.

LncRNAs have also been usually postulated to act as competing endogenous RNA (ceRNA) or “RNA sponges”, interacting with miRNAs in a manner that can sequester these molecules and reduce their regulatory effect on target mRNA. This type of lncRNA is found typically distributed in cytoplasm and associated with the RNA-induced silencing complex (RISC). However, our RNA pull-down results showed that there was no direct binding between AY and AGO2 protein, a core member of RISC (Supplemental Figure 2A).

LncRNAs interact with proteins to modulate protein function, regulate or direct

localization within cellular compartments. These interactions are central to determine lncRNA functional effects, yet characterizing protein or lncRNA has presented significant challenges. Through mass spectrometry and protein chip assay, we identified H1FX, a variant of histone 1, as the interacting protein. Gene ontology (GO) analysis of protein arrays showed potential interactions of AY with proteins that were mainly enriched in biological processes such as cell-cell adhesion and RNA processing (Supplemental Figure 2B). Overexpression of AY repelled H1FX binding from the nucleosome and promoter of *ITGAV* gene. H1FX interacted with nucleolin. But this interaction was not enhanced by AY (Supplemental Figure 2C) or reduced by RNase treatment (Supplemental Figure 2D). Comparing the sequence between the unbound H1 variants (H1.0, H1.1, H1.5) and bound H1 variants (H1FX, H1.2, H1.3, H1.4), we noted that there is a significant divergence in the central region from 80 to 150 (Supplemental Figure 2E) constituting the globular domain of linker histone. This suggested that AY might interact with H1FX through the globular domain which is the binding site for linker DNA. Thus interaction of AY with H1fx may hinder H1FX binding to the promoter and nucleosome core particles. This might be another reason for AY repelling H1FX binding from the promoter of *ITGAV* gene.

## References

1. Schmitt AM, Chang HY. Long Noncoding RNAs in Cancer Pathways. *Cancer cell*. 2016;29:452-63.

## Figure legends

### Supplemental Figure 1. LncRNA AY analysis in human hepatocellular carcinoma cells.

**A.** Coding probability prediction for AY927503 by Coding Potential Assessment Tool (CPAT)( <http://lilab.research.bcm.edu/cpat/> ) and CPC (coding potential calculator).  $\beta$ -actin (ACTB) as positive control and long non-coding RNA MALAT1 as negative control.

**B.** In situ hybridization analysis of AY expression in 57 paired HCC tissues (T) and adjacent nontumor (NT) tissues. The positive signals per cell were comparatively analyzed between HCC tissues and non-tumor tissues.

**C.** Measurement of integrin subtypes by qPCR in Hep3B cells transfected with AY or control plasmid (Mock).

**D.** AY-mediated cell migration in wound healing of BEL-7404 cells transfected with pcDNA3.1b-AY and/or pSilencer 4.1-shITGAV, and of SMMC-7721 cells transfected with pSilencer 4.1- shAY and/or pcDNA3.1b-ITGAV. Relative wound closure is quantified in low panel. Original magnification: 10 $\times$ . \*, $P$ <0.05; \*\*, $P$ <0.01.

**E.** Representative micrographs of AY-overexpressing and AY-knockdown cells and their control in transmembrane migration assays (left) and quantitative analysis of migration (right). Original magnification: 10 $\times$ . \*, $P$ <0.05

**F.** QPCR analysis of ZNF282 in Hep3B cells transfected with plasmid pcDNA3.1b-AY for overexpression of AY and pSilencer4.1-shAY for knockdown of AY respectively. Mock and Scramble served as corresponding control.

**G.** Pearson correlation analysis of ZNF282, AY, and ITGAV mRNAs expressed in HCC from TCGA database. Comparison analysis of mRNA levels of ZNF282 between HCC and nontumor tissues was also performed.

**Supplemental Figure 2. Linker histone H1FX interaction and sequence analysis.**

**A.** RNA pull-down assay by biotinylated AY full length RNA (AY-FL), biotinylated AY antisense RNA (AY-AS), or control biotin (Ctrl). The protein of the complex was analyzed by Western blot using AGO2 antibody.

**B.** GO (Gene Ontology) analysis of potential proteins associated with AY obtained from protein array studies. BP, Biological Process; MF, Molecular Function.

**C.** Nucleolin and H1FX proteins were analyzed by Western blotting in the complex Immunoprecipitated (IP) by H1FX antibody and input group.

**D.** Comparison analysis of nucleolin and H1FX in the immunoprecipitation complex treated with and without RNase (67 ng/ $\mu$ l).

**E.** Sequence alignment analysis among linker histone variants. The sequence in the framed part from their globular domains shows great divergence.



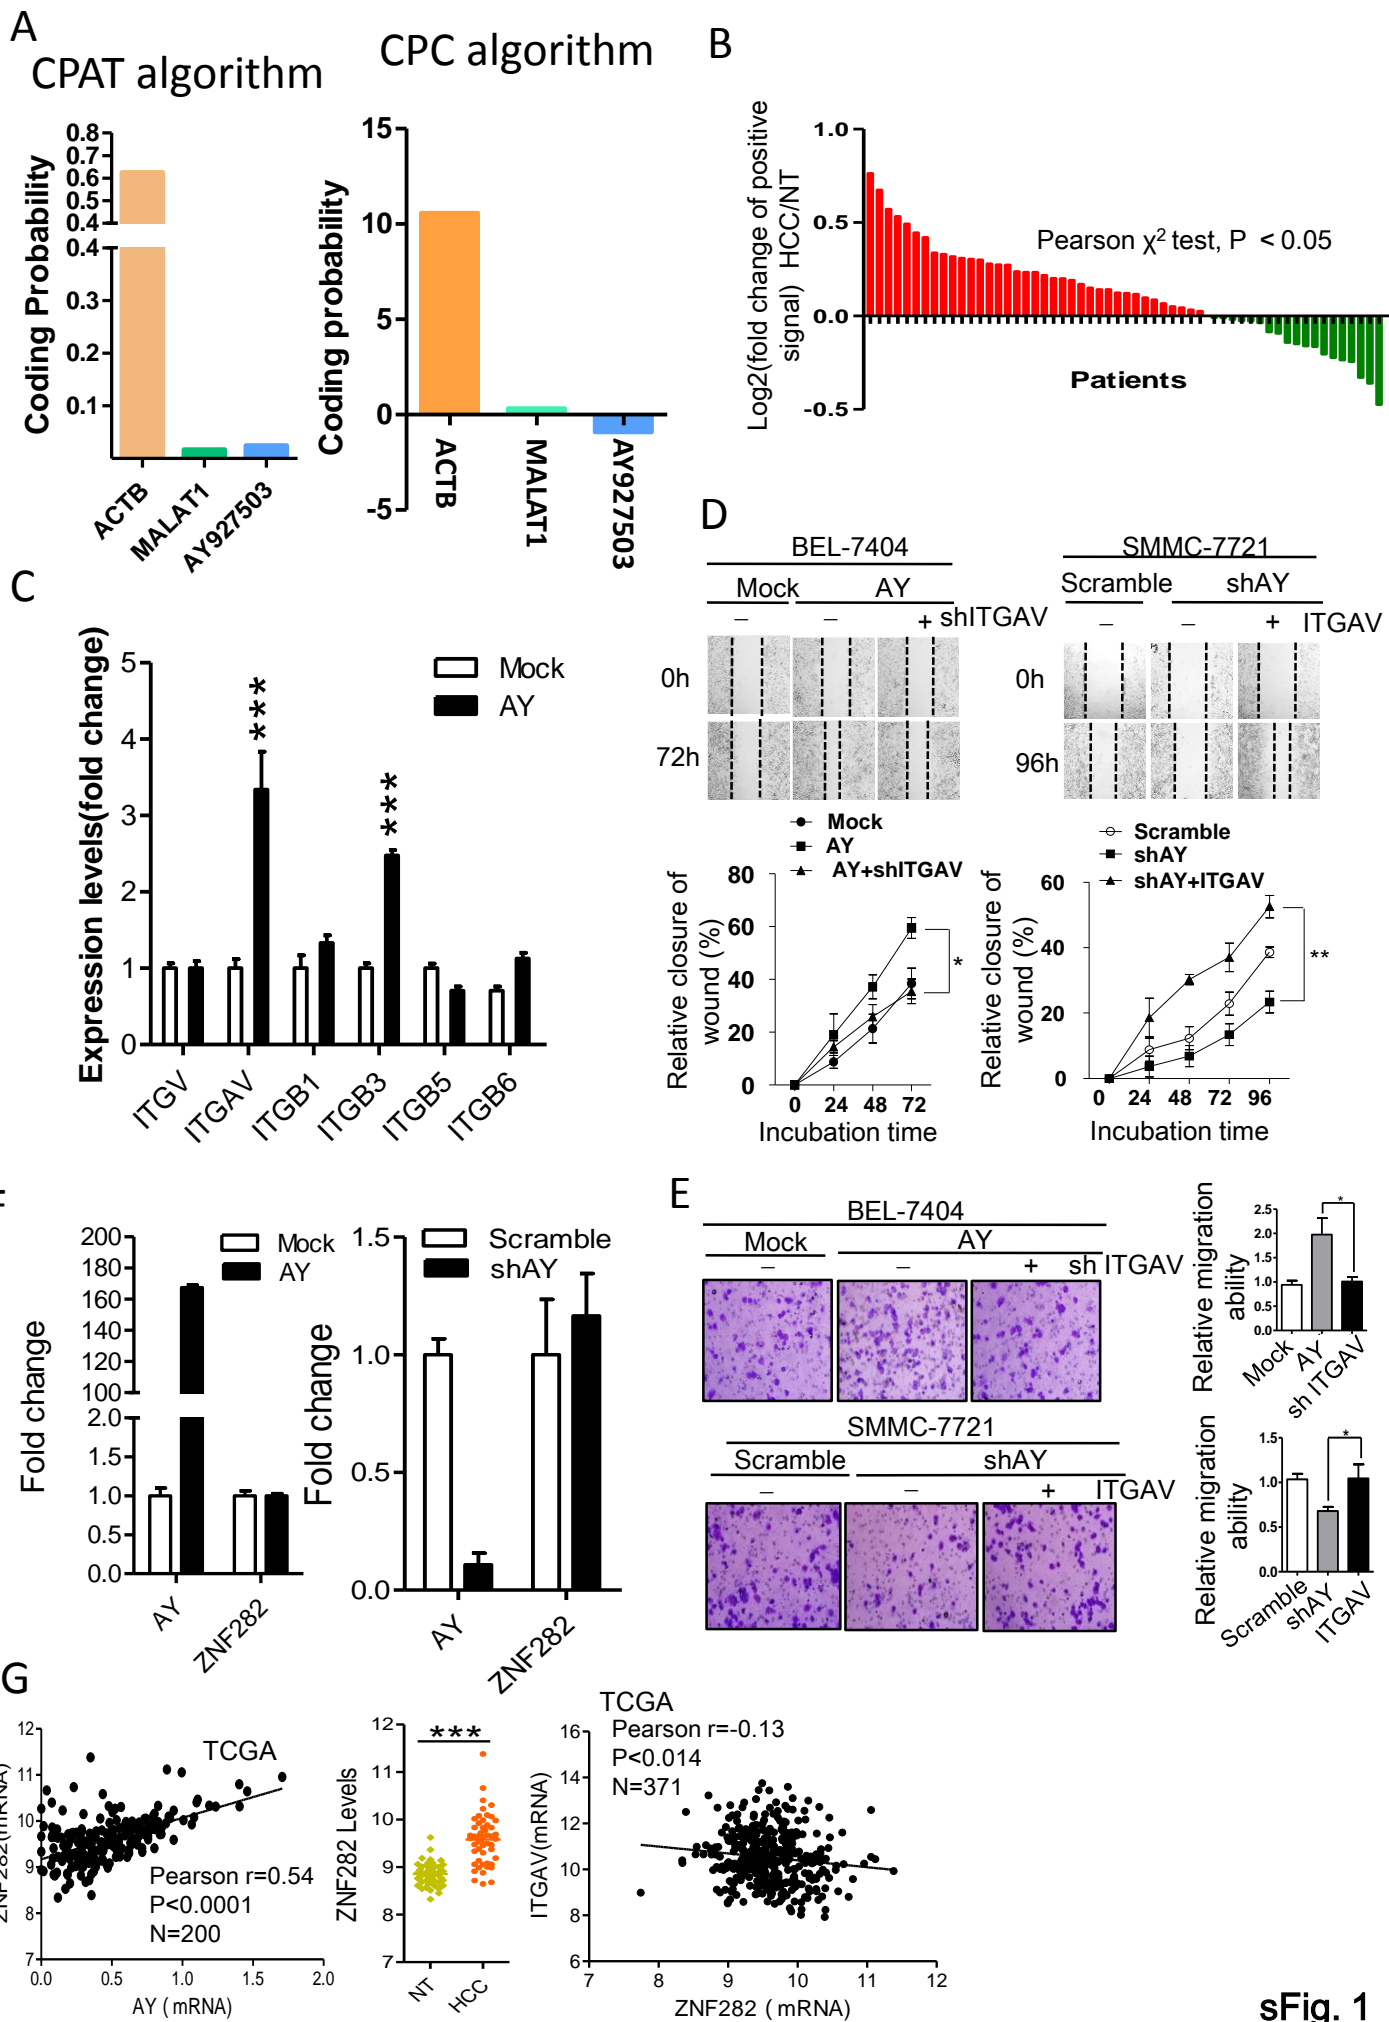

sFig. 1

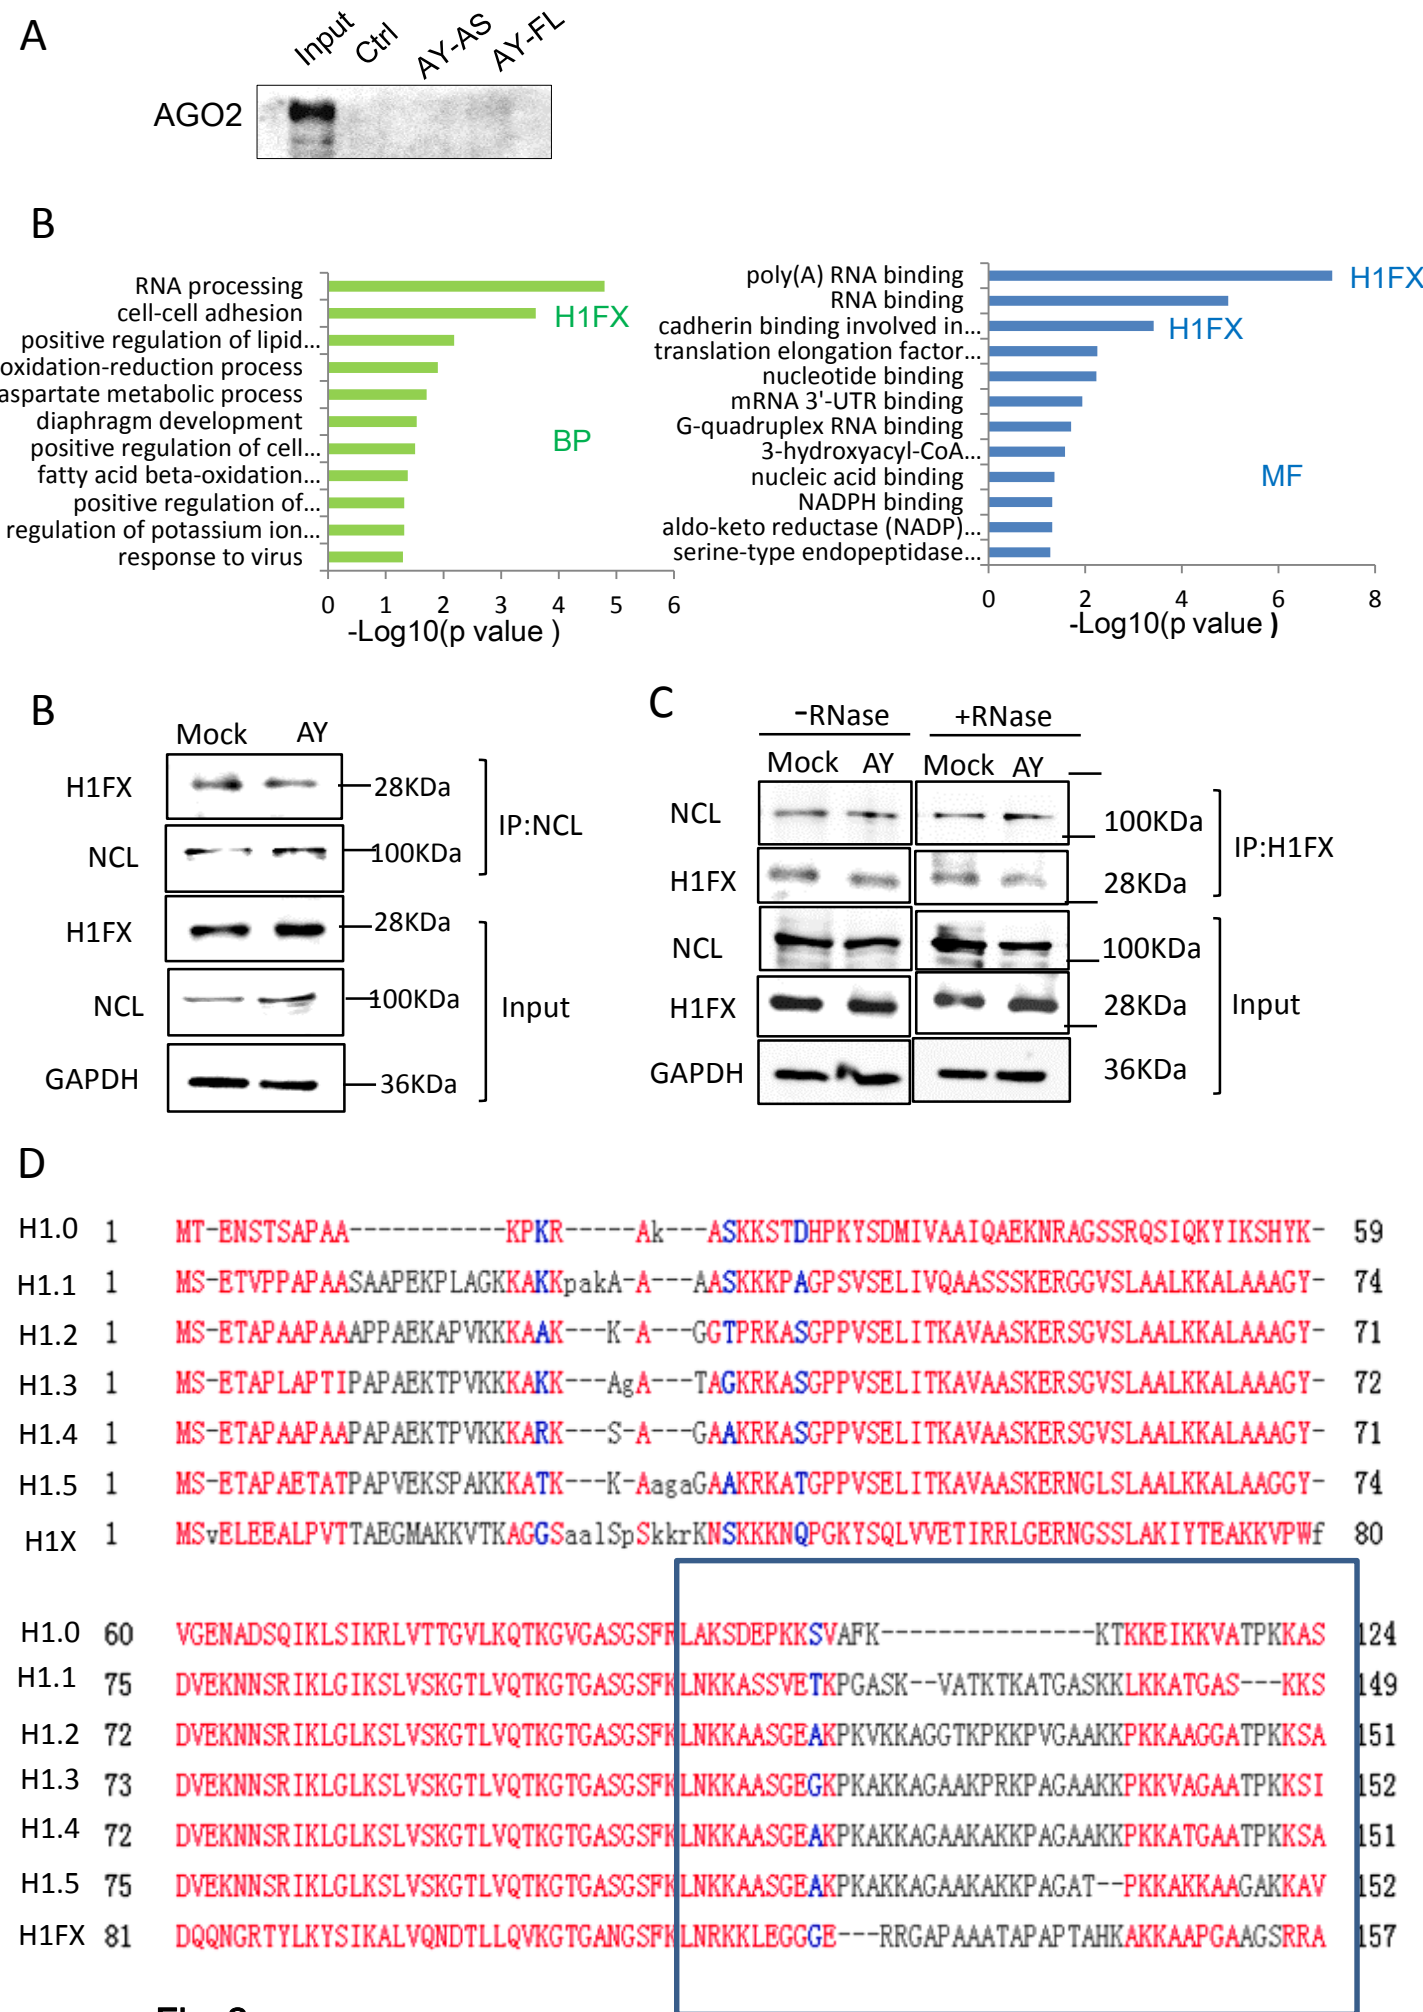

sFig. 2
